# Supplementary material for: Immunogenicity of alternative ten-valent pneumococcal conjugate vaccine schedules in infants in Ho Chi Minh City, Vietnam: results from a single-blind, parallel-group, open-label, randomised, controlled trial
Source: PubMed Central journal article supplement (PMC8461081; doi:10.1016/s1473-3099(20)30775-1), 2021-10
Supplement: mmc1.pdf [file mmc1.pdf]

# THE LANCET

## Infectious Diseases

### Supplementary appendix

This appendix formed part of the original submission and has been peer reviewed. We post it as supplied by the authors.

Supplement to: Licciardi PV, Temple B, Dai VTT, et al. Immunogenicity of alternative ten-valent pneumococcal conjugate vaccine schedules in infants in Ho Chi Minh City, Vietnam: results from a single-blind, parallel-group, open-label, randomised, controlled trial. *Lancet Infect Dis* 2021; published online June 22. [https://doi.org/10.1016/S1473-3099\(20\)30775-1](https://doi.org/10.1016/S1473-3099(20)30775-1).

## LIST OF APPENDIX TABLES AND FIGURES

|            |                                                                                                                                                                                                                                                            |    |
|------------|------------------------------------------------------------------------------------------------------------------------------------------------------------------------------------------------------------------------------------------------------------|----|
| Table S1:  | Timing of vaccinations and blood draws .....                                                                                                                                                                                                               | 2  |
| Table S2:  | Baseline characteristics by study group .....                                                                                                                                                                                                              | 3  |
| Figure S1: | Comparative immunogenicity of PCV10 when administered according to different primary series schedules at 4 weeks post-primary series. ....                                                                                                                 | 4  |
| Table S3:  | Post-primary series immunogenicity of PCV10 in the intention-to-treat population. ....                                                                                                                                                                     | 5  |
| Figure S2: | Comparison of PCV10 immunogenicity post-primary series between infants who received a two doses at 2, 4 months or 2, 6 months (top panel) or between infants who received two doses at 2, 6 months or a 2+1 schedule at 2, 4, 9 months (bottom panel)..... | 6  |
| Table S4:  | Pre- and post-booster responses .....                                                                                                                                                                                                                      | 7  |
| Table S5:  | Antibody levels at 18 months of age.....                                                                                                                                                                                                                   | 8  |
| Figure S3: | Comparison of serotype-specific IgG and OPA responses in the A) 3+0 and B) 2+1 PCV10 schedules. ....                                                                                                                                                       | 9  |
| Table S6:  | Comparative immunogenicity of a two-dose schedule (at 2 and 6 months of age) and a 2+1 schedule (at 2, 4, and 9 months of age) by ELISA and OPA.....                                                                                                       | 10 |

**Table S1: Timing of vaccinations and blood draws**

|                                | <b>Group A</b>                  | <b>Group B</b>                  | <b>Group C</b>                  | <b>Group D</b>                  |
|--------------------------------|---------------------------------|---------------------------------|---------------------------------|---------------------------------|
| PCV10 schedule                 | 2, 3, 4 & 9 months (3+1)        | 2, 3 & 4 months (3+0)           | 2, 4 & 9.5* months (2+1)        | 2 & 6 months (two-dose)         |
| Co-administered vaccines:      |                                 |                                 |                                 |                                 |
| DTP-Hib-HBV-IPV                | 2, 3, 4 & 19 months             | 2, 3, 4 & 19 months             | 2, 4, 9.5* & 19 months          | 2, 4, 6 & 19 months             |
| measles                        | 9 & 18 months                   | 9 & 18 months                   | 9 & 18 months                   | 9 & 18 months                   |
| Blood samples:                 |                                 |                                 |                                 |                                 |
| 4-weeks post-one dose          |                                 |                                 |                                 | 3 months                        |
| 4-weeks post-primary series    | 5 months                        | 5 months                        | 5 months                        | 7 months                        |
| 6 months of age                |                                 | 6 months                        | 6 months (subset) <sup>†</sup>  | 6 months                        |
| Pre-booster/9 months           | 9 months                        | 9 months (subset) <sup>†</sup>  | 9 months                        | 9 months (subset) <sup>†</sup>  |
| 4-weeks post-booster/10 months | 10 months                       | 10 months                       | 10 months                       |                                 |
| 18 months of age               | 18 months (subset) <sup>†</sup> | 18 months (subset) <sup>†</sup> | 18 months (subset) <sup>†</sup> | 18 months (subset) <sup>†</sup> |

PCV10 = 10-valent pneumococcal conjugate vaccine. DTP-Hib-HBV-IPV = hexavalent diphtheria, tetanus, pertussis, polio, *Haemophilus influenzae* type b, and hepatitis B vaccine.

\* The booster doses of PCV10 and DTP-Hib-HBV-IPV in Group C were administered at 9.5 months of age as the Vietnamese Ministry of Health does not permit co-administration of measles and DTaP-IPV-Hib-HepB. <sup>†</sup> Participants allocated to Groups A–D from the last 300 recruited provided a blood sample at 18 months of age, with the remainder providing a sample at an alternative time point, as a maximum of 4 blood samples per participant were permitted by the Vietnamese Ministry of Health.

**Table S2: Baseline characteristics by study group**

|                                   | <b>Group A</b><br>(n=152) | <b>Group B</b><br>(n=149) | <b>Group C</b><br>(n=250) | <b>Group D</b><br>(n=202) |
|-----------------------------------|---------------------------|---------------------------|---------------------------|---------------------------|
| <b>Sex</b>                        |                           |                           |                           |                           |
| Male                              | 66 (43%)                  | 73 (49%)                  | 135 (54%)                 | 91 (45%)                  |
| Female                            | 86 (57%)                  | 76 (51%)                  | 115 (46%)                 | 111 (55%)                 |
| <b>District</b>                   |                           |                           |                           |                           |
| 4                                 | 68 (45%)                  | 67 (45%)                  | 112 (45%)                 | 90 (45%)                  |
| 7                                 | 84 (55%)                  | 82 (55%)                  | 138 (55%)                 | 112 (55%)                 |
| <b>Birthweight (g)*</b>           | 3234 (424)                | 3212 (349)                | 3228 (370)                | 3234 (410)                |
| <b>Place of delivery</b>          |                           |                           |                           |                           |
| Hospital                          | 149 (98%)                 | 149 (100%)                | 245 (98%)†                | 194 (96%)                 |
| Other                             | 3 (2%)                    | 0 (0%)                    | 4 (2%)                    | 8 (4%)                    |
| <b>Type of delivery</b>           |                           |                           |                           |                           |
| Normal                            | 89 (59%)                  | 85 (57%)                  | 160 (64%)                 | 130 (64%)                 |
| Elective caesarean                | 30 (20%)                  | 30 (20%)                  | 43 (17%)                  | 36 (18%)                  |
| Emergency caesarean               | 27 (18%)                  | 30 (20%)                  | 40 (16%)                  | 34 (17%)                  |
| Other/unknown                     | 6 (4%)                    | 4 (3%)                    | 7 (3%)                    | 2 (1%)                    |
| <b>Cigarette smoker in house</b>  |                           |                           |                           |                           |
| No                                | 57 (38%)                  | 52 (35%)                  | 81 (33%)†                 | 74 (37%)                  |
| Yes                               | 95 (62%)                  | 97 (65%)                  | 168 (67%)                 | 128 (63%)                 |
| <b>Breastfeeding at enrolment</b> |                           |                           |                           |                           |
| No                                | 41 (27%)†                 | 42 (28%)                  | 55 (22%)                  | 37 (18%)                  |
| Yes                               | 110 (73%)                 | 107 (72%)                 | 195 (78%)                 | 165 (82%)                 |

Data are n(%) or mean(SD).

\* Birthweight data missing for 7 participants (1, 3, and 3 from Groups B, C, and D, respectively).

† Data missing for one participant.

**Figure S1: Comparative immunogenicity of PCV10 when administered according to different primary series schedules at 4 weeks post-primary series.**

The data are differences in the proportions of infants with protective serotype-specific IgG concentrations ( $\geq 0.35\mu\text{g/mL}$ ) (A) Three-dose primary series of PCV10 (at 2, 3, 4 months; combined Groups A+B) versus two-dose primary series of PCV10 (at 2, 4 months; Group C). (B) Two-dose primary series of PCV10 (Group C) given at 2, 4 months compared with a two-dose primary series of PCV10 (Group D) given at 2, 6 months. Bars represent 90% CIs for one-sided tests of non-inferiority (A) or 95% CIs for two-sided tests of difference (B), with solid vertical lines indicating the predefined thresholds for determining non-inferiority or differences between groups.

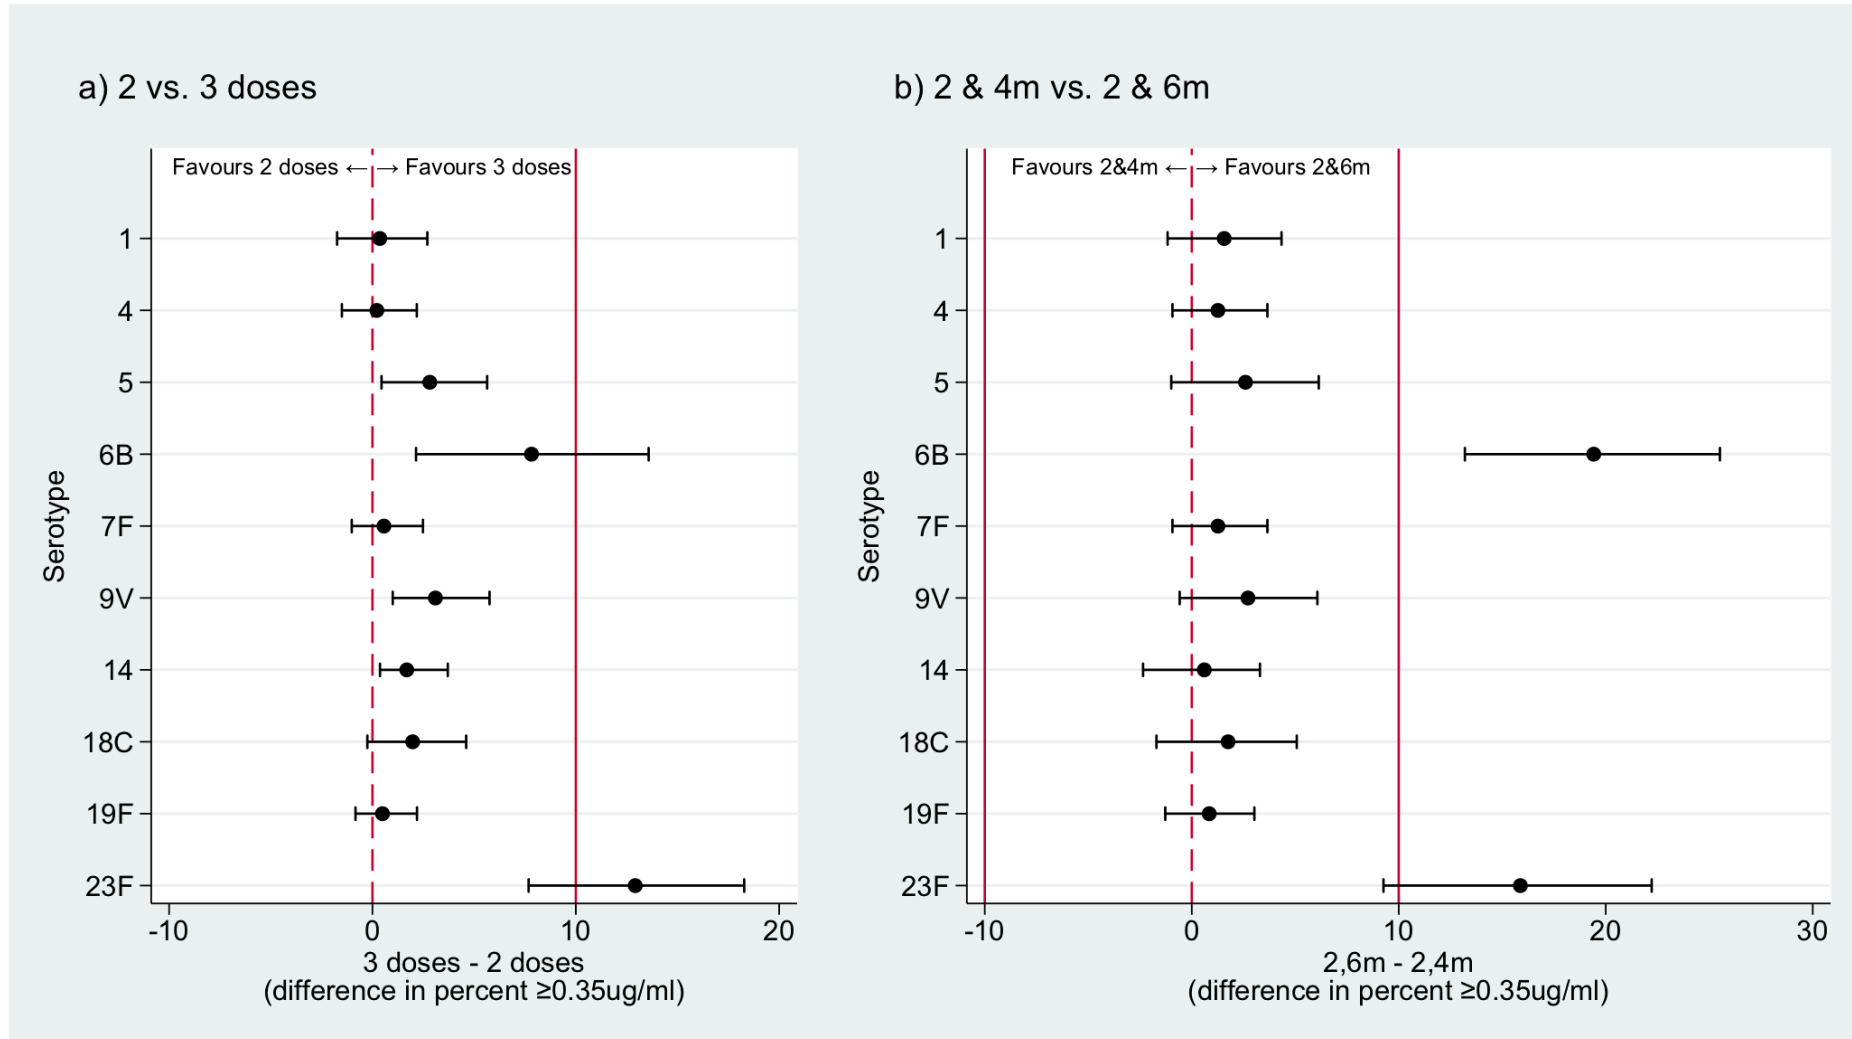

**Table S3: Post-primary series immunogenicity of PCV10 in the intention-to-treat population.**

|                          | Participants with IgG concentration<br>≥0.35µg/ml, % (95% CI) |                      |                      | Risk difference, %                  |                                | GMC, µg/ml (95% CI)   |                       |                         | GMC ratio (95% CI)   |                      |
|--------------------------|---------------------------------------------------------------|----------------------|----------------------|-------------------------------------|--------------------------------|-----------------------|-----------------------|-------------------------|----------------------|----------------------|
|                          | 2,3,4m<br>(n=289)                                             | 2,4m<br>(n=240)      | 2,6m<br>(n=195)      | 2,3,4m<br>minus<br>2,4m<br>(90% CI) | 2,6m minus<br>2,4m<br>(95% CI) | 2,3,4m<br>(n=289)     | 2,4m<br>(n=240)       | 2,6m<br>(n=195)         | 2,3,4m /<br>2,4m     | 2,6m / 2,4m          |
| Vaccine serotypes        |                                                               |                      |                      |                                     |                                |                       |                       |                         |                      |                      |
| 1                        | 98.3<br>(96.0, 99.4)                                          | 97.9<br>(95.2, 99.3) | 99.5<br>(97.2, 100)  | 0.4<br>(-1.7, 2.7)                  | 1.6<br>(-1.0, 4.3)             | 2.78<br>(2.51, 3.08)  | 2.22<br>(1.98, 2.48)  | 3.30<br>(2.93, 3.72)    | 1.25<br>(1.08, 1.46) | 1.49<br>(1.26, 1.75) |
| 4                        | 99.0<br>(97.0, 99.8)                                          | 98.8<br>(96.4, 99.7) | 100<br>(98.1, 100)   | 0.2<br>(-1.5, 2.2)                  | 1.3<br>(-0.9, 3.6)             | 3.85<br>(3.45, 4.30)  | 3.21<br>(2.88, 3.58)  | 4.20<br>(3.76, 4.68)    | 1.20<br>(1.02, 1.40) | 1.31<br>(1.12, 1.53) |
| 5                        | 98.6<br>(96.5, 99.6)                                          | 95.8<br>(92.5, 98.0) | 98.5<br>(95.6, 99.7) | 2.8<br>(0.4, 5.6)                   | 2.6<br>(-0.8, 6.1)             | 1.82<br>(1.67, 1.98)  | 1.17<br>(1.07, 1.27)  | 1.28<br>(1.17, 1.39)    | 1.55<br>(1.38, 1.75) | 1.09<br>(0.97, 1.23) |
| 6B                       | 84.4<br>(79.7, 88.4)                                          | 77.1<br>(71.2, 82.2) | 96.4<br>(92.7, 98.5) | 7.3<br>(1.7, 13.1)                  | 19.3<br>(13.3, 25.3)           | 1.08<br>(0.95, 1.23)  | 0.80<br>(0.70, 0.92)  | 2.62<br>(2.29, 3.00)    | 1.34<br>(1.11, 1.62) | 3.26<br>(2.69, 3.96) |
| 7F                       | 99.3<br>(97.5, 99.9)                                          | 98.8<br>(96.4, 99.7) | 99.5<br>(97.2, 100)  | 0.6<br>(-1.0, 2.5)                  | 0.7<br>(-1.7, 3.1)             | 3.03<br>(2.78, 3.30)  | 2.07<br>(1.89, 2.26)  | 2.16<br>(1.97, 2.36)    | 1.47<br>(1.30, 1.66) | 1.05<br>(0.92, 1.19) |
| 9V                       | 99.3<br>(97.5, 99.9)                                          | 96.3<br>(93.0, 98.3) | 99.0<br>(96.3, 99.9) | 3.1<br>(1.0, 5.7)                   | 2.7<br>(-0.4, 6.0)             | 2.47<br>(2.26, 2.70)  | 1.63<br>(1.47, 1.81)  | 2.37<br>(2.14, 2.62)    | 1.52<br>(1.32, 1.74) | 1.45<br>(1.26, 1.68) |
| 14                       | 100<br>(98.7, 100)                                            | 98.3<br>(95.8, 99.5) | 99.0<br>(96.3, 99.9) | 1.7<br>(0.4, 3.7)                   | 0.6<br>(-2.2, 3.3)             | 9.72<br>(8.76, 10.79) | 5.92<br>(5.17, 6.78)  | 8.57<br>(7.45, 9.85)    | 1.64<br>(1.39, 1.94) | 1.45<br>(1.19, 1.76) |
| 18C                      | 98.6<br>(96.5, 99.6)                                          | 96.7<br>(93.5, 98.6) | 98.5<br>(95.6, 99.7) | 1.9<br>(-0.3, 4.5)                  | 1.8<br>(-1.5, 5.1)             | 3.86<br>(3.47, 4.29)  | 1.87<br>(1.65, 2.12)  | 2.93<br>(2.60, 3.30)    | 2.06<br>(1.76, 2.43) | 1.57<br>(1.32, 1.87) |
| 19F                      | 99.7<br>(98.1, 100)                                           | 99.2<br>(97.0, 99.9) | 100<br>(98.1, 100)   | 0.5<br>(-0.8, 2.2)                  | 0.8<br>(-1.2, 3.0)             | 8.22<br>(7.42, 9.12)  | 9.56<br>(8.40, 10.88) | 16.15<br>(14.27, 18.28) | 0.86<br>(0.73, 1.01) | 1.69<br>(1.41, 2.02) |
| 23F                      | 90.3<br>(86.3, 93.5)                                          | 77.9<br>(72.1, 83.0) | 93.8<br>(89.5, 96.8) | 12.4<br>(7.2, 17.7)                 | 15.9<br>(9.5, 22.2)            | 1.32<br>(1.18, 1.48)  | 0.89<br>(0.78, 1.02)  | 2.16<br>(1.90, 2.46)    | 1.48<br>(1.24, 1.76) | 2.43<br>(2.01, 2.93) |
| Cross-reacting serotypes |                                                               |                      |                      |                                     |                                |                       |                       |                         |                      |                      |
| 6A                       | 50.5<br>(44.6, 56.4)                                          | 40.8<br>(34.6, 47.3) | 70.3<br>(63.3, 76.6) | 9.7<br>(2.5, 16.7)                  | 29.4<br>(20.2, 37.9)           | 0.37<br>(0.34, 0.41)  | 0.31<br>(0.28, 0.35)  | 0.65<br>(0.57, 0.74)    | 1.18<br>(1.02, 1.36) | 2.07<br>(1.74, 2.46) |
| 19A                      | 67.8<br>(62.1, 73.2)                                          | 70.0<br>(63.8, 75.7) | 85.6<br>(79.9, 90.2) | -2.2<br>(-8.7, 4.5)                 | 15.6<br>(7.8, 23.0)            | 0.56<br>(0.50, 0.62)  | 0.55<br>(0.49, 0.61)  | 0.93<br>(0.81, 1.06)    | 1.02<br>(0.88, 1.19) | 1.70<br>(1.42, 2.02) |

Immunogenicity data 4-weeks after three doses (at 2, 3, and 4 months of age, Group A+B), two doses (at 2 and 4 months of age, Group C), or two doses (at 2 and 6 months of age, Group D).

**Figure S2: Comparison of PCV10 immunogenicity post-primary series between infants who received a two doses at 2, 4 months or 2, 6 months (top panel) or between infants who received two doses at 2, 6 months or a 2+1 schedule at 2, 4, 9 months (bottom panel).**

Geometric mean ratios for serotype-specific IgG (A) and opsonophagocytosis (B) are shown with 95% CIs. Comparisons were made at 5 months of age (2, 4m schedule), 7 months of age (2, 6m schedule) or 10 months of age (2, 4, 9m schedule). GMC=geometric mean concentration; GMOI=geometric mean opsonisation index.

## Ratio of IgG GMCs

## Ratio of OPA GMOIs

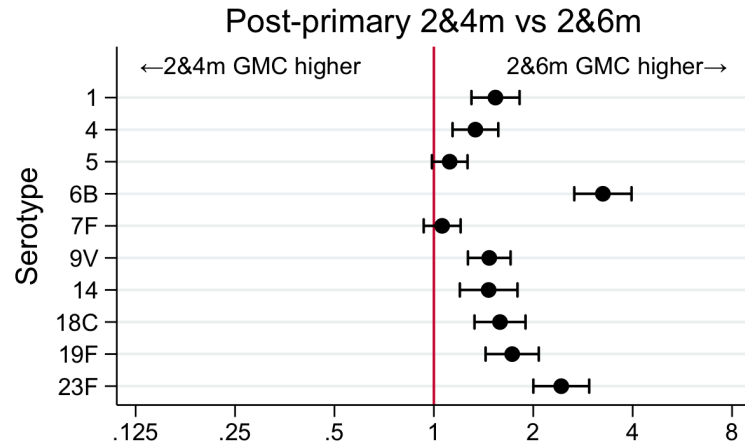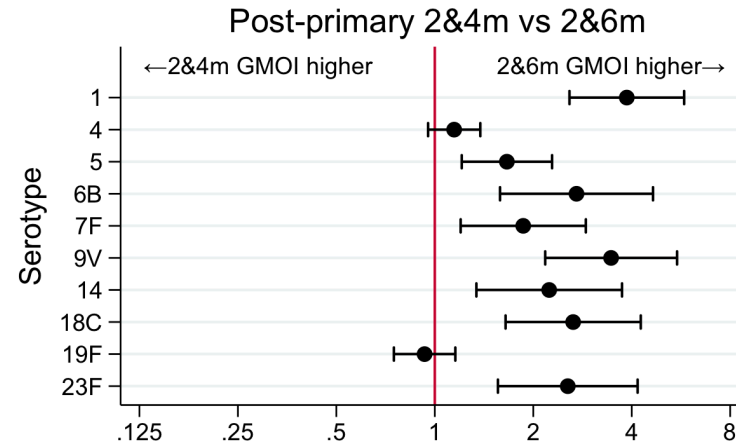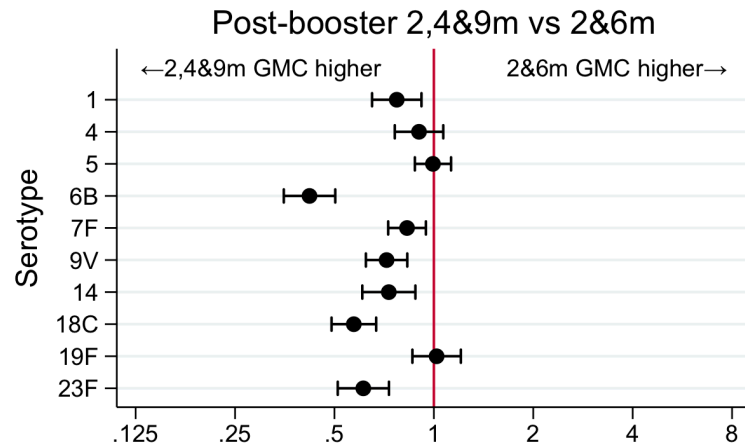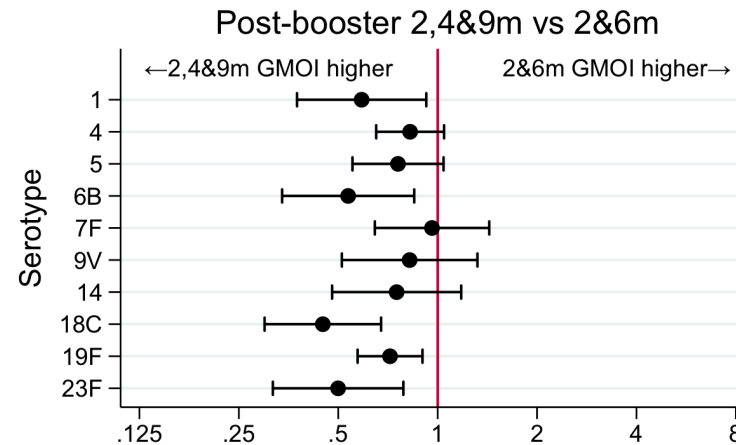

**Table S4: Pre- and post-booster responses**

**a) IgG GMCs (95% CI) pre- and post-booster in a 3+1 or 2+1 PCV10 schedule, or at 9 and 10 months of age in a 3+0 PCV10 schedule**

|                          | 3+1                    |                         | 2+1                    |                         | 3+0               |                   | GMC ratio (95% CI)         |                             |
|--------------------------|------------------------|-------------------------|------------------------|-------------------------|-------------------|-------------------|----------------------------|-----------------------------|
|                          | Pre-booster<br>(n=145) | Post-booster<br>(n=137) | Pre-booster<br>(n=236) | Post-booster<br>(n=226) | 9m<br>(n=90)      | 10m<br>(n=133)    | Pre-booster<br>(3+1 / 2+1) | Post-booster<br>(3+1 / 2+1) |
| Vaccine serotypes        |                        |                         |                        |                         |                   |                   |                            |                             |
| 1                        | 0.90 (0.79, 1.03)      | 5.85 (4.92, 6.96)       | 0.71 (0.64, 0.79)      | 4.40 (3.91, 4.97)       | 0.94 (0.79, 1.12) | 0.78 (0.67, 0.91) | 1.26 (1.07, 1.49)          | 1.33 (1.08, 1.63)           |
| 4                        | 1.38 (1.20, 1.59)      | 6.06 (5.13, 7.16)       | 1.09 (0.98, 1.22)      | 4.75 (4.20, 5.37)       | 1.43 (1.19, 1.73) | 1.16 (0.99, 1.36) | 1.27 (1.06, 1.51)          | 1.28 (1.04, 1.56)           |
| 5                        | 0.77 (0.69, 0.86)      | 1.96 (1.74, 2.22)       | 0.54 (0.49, 0.59)      | 1.31 (1.20, 1.43)       | 0.71 (0.61, 0.83) | 0.68 (0.60, 0.78) | 1.44 (1.25, 1.67)          | 1.50 (1.29, 1.73)           |
| 6B                       | 2.23 (1.97, 2.51)      | 7.42 (6.38, 8.63)       | 1.63 (1.44, 1.83)      | 6.17 (5.50, 6.92)       | 2.34 (1.94, 2.83) | 2.14 (1.83, 2.52) | 1.37 (1.14, 1.64)          | 1.20 (1.00, 1.45)           |
| 7F                       | 1.23 (1.09, 1.40)      | 4.53 (3.93, 5.22)       | 0.83 (0.76, 0.91)      | 2.65 (2.41, 2.91)       | 1.19 (1.01, 1.40) | 0.95 (0.82, 1.10) | 1.48 (1.27, 1.74)          | 1.71 (1.45, 2.01)           |
| 9V                       | 1.14 (1.01, 1.30)      | 4.67 (4.09, 5.34)       | 0.75 (0.68, 0.84)      | 3.34 (3.02, 3.69)       | 1.18 (1.00, 1.39) | 1.07 (0.92, 1.25) | 1.52 (1.29, 1.79)          | 1.40 (1.19, 1.65)           |
| 14                       | 5.91 (5.09, 6.86)      | 16.14 (13.72, 18.98)    | 3.41 (2.96, 3.94)      | 11.76 (10.45, 13.24)    | 6.74 (5.44, 8.34) | 5.59 (4.63, 6.74) | 1.73 (1.39, 2.15)          | 1.37 (1.13, 1.67)           |
| 18C                      | 1.06 (0.93, 1.21)      | 6.65 (5.76, 7.67)       | 0.81 (0.72, 0.90)      | 5.16 (4.68, 5.70)       | 1.13 (0.95, 1.36) | 0.89 (0.76, 1.02) | 1.32 (1.11, 1.57)          | 1.29 (1.09, 1.52)           |
| 19F                      | 3.70 (3.30, 4.15)      | 16.26 (14.04, 18.83)    | 3.94 (3.59, 4.31)      | 16.16 (14.45, 18.08)    | 4.00 (3.35, 4.78) | 3.39 (2.91, 3.95) | 0.94 (0.81, 1.09)          | 1.01 (0.84, 1.21)           |
| 23F                      | 1.01 (0.89, 1.14)      | 4.81 (4.18, 5.54)       | 0.76 (0.68, 0.86)      | 3.55 (3.15, 3.99)       | 1.25 (1.02, 1.53) | 1.03 (0.86, 1.23) | 1.32 (1.10, 1.58)          | 1.36 (1.12, 1.63)           |
| Cross-reacting serotypes |                        |                         |                        |                         |                   |                   |                            |                             |
| 6A                       | 0.67 (0.58, 0.77)      | 1.62 (1.32, 1.98)       | 0.57 (0.51, 0.65)      | 1.44 (1.25, 1.66)       | 0.81 (0.65, 1.00) | 0.75 (0.63, 0.89) | 1.16 (0.96, 1.40)          | 1.12 (0.88, 1.43)           |
| 19A                      | 0.67 (0.59, 0.75)      | 1.75 (1.48, 2.05)       | 0.66 (0.60, 0.73)      | 1.76 (1.55, 2.00)       | 0.86 (0.71, 1.04) | 0.80 (0.69, 0.93) | 1.01 (0.87, 1.18)          | 0.99 (0.81, 1.22)           |

**b) Percentage of participants with IgG  $\geq 0.35\mu\text{g/ml}$  (95% CI) pre- and post-booster in a 3+1 or 2+1 PCV10 schedule, or at 9 and 10 months of age in a 3+0 PCV10 schedule**

|                          | 3+1                    |                         | 2+1                    |                         | 3+0               |                    | Risk difference, % (95% CI)       |                                    |
|--------------------------|------------------------|-------------------------|------------------------|-------------------------|-------------------|--------------------|-----------------------------------|------------------------------------|
|                          | Pre-booster<br>(n=145) | Post-booster<br>(n=137) | Pre-booster<br>(n=236) | Post-booster<br>(n=226) | 9m<br>(n=90)      | 10m<br>(n=133)     | Pre-booster<br>(3+1 minus<br>2+1) | Post-booster<br>(3+1 minus<br>2+1) |
| Vaccine serotypes        |                        |                         |                        |                         |                   |                    |                                   |                                    |
| 1                        | 91.7 (86.0, 95.7)      | 100 (97.3, 100)         | 82.6 (77.2, 87.2)      | 100 (98.4, 100)         | 90.0 (81.9, 95.3) | 86.5 (79.5, 91.8)  | 9.1 (2.0, 15.5)                   | 0.0 (-2.7, 1.7)                    |
| 4                        | 97.9 (94.1, 99.6)      | 100 (97.3, 100)         | 91.1 (86.7, 94.4)      | 98.7 (96.2, 99.7)       | 94.4 (87.5, 98.2) | 91.0 (84.8, 95.3)  | 6.8 (2.0, 11.4)                   | 1.3 (-1.5, 3.8)                    |
| 5                        | 89.7 (83.5, 94.1)      | 100 (97.3, 100)         | 75.4 (69.4, 80.8)      | 97.8 (94.9, 99.3)       | 86.7 (77.9, 92.9) | 82.0 (74.4, 88.1)  | 14.2 (6.4, 21.3)                  | 2.2 (-0.8, 5.1)                    |
| 6B                       | 98.6 (95.1, 99.8)      | 100 (97.3, 100)         | 94.9 (91.3, 97.3)      | 100 (98.4, 100)         | 97.8 (92.2, 99.7) | 94.7 (89.5, 97.9)  | 3.7 (-0.4, 7.4)                   | 0.0 (-2.7, 1.7)                    |
| 7F                       | 95.2 (90.3, 98.0)      | 100 (97.3, 100)         | 90.3 (85.7, 93.7)      | 99.6 (97.6, 100)        | 95.6 (89.0, 98.8) | 91.0 (84.8, 95.3)  | 4.9 (-0.8, 10.0)                  | 0.4 (-2.3, 2.5)                    |
| 9V                       | 94.5 (89.4, 97.6)      | 100 (97.3, 100)         | 86.0 (80.9, 90.2)      | 100 (98.4, 100)         | 94.4 (87.5, 98.2) | 91.0 (84.8, 95.3)  | 8.5 (2.2, 14.1)                   | 0.0 (-2.7, 1.7)                    |
| 14                       | 100 (97.5, 100)        | 100 (97.3, 100)         | 97.5 (94.5, 99.1)      | 99.6 (97.6, 100)        | 100 (96.0, 100)   | 98.5 (94.7, 99.8)  | 2.5 (-0.4, 5.4)                   | 0.4 (-2.3, 2.5)                    |
| 18C                      | 93.8 (88.5, 97.1)      | 100 (97.3, 100)         | 84.7 (79.5, 89.1)      | 100 (98.4, 100)         | 92.2 (84.6, 96.8) | 89.5 (83.0, 94.1)  | 9.0 (2.5, 15.0)                   | 0.0 (-2.7, 1.7)                    |
| 19F                      | 99.3 (96.2, 100)       | 100 (97.3, 100)         | 100 (98.4, 100)        | 100 (98.4, 100)         | 100 (96.0, 100)   | 99.2 (95.9, 100.0) | -0.7 (-3.8, 1.0)                  | 0.0 (-2.7, 1.7)                    |
| 23F                      | 89.7 (83.5, 94.1)      | 100 (97.3, 100)         | 83.1 (77.6, 87.6)      | 98.7 (96.2, 99.7)       | 91.1 (83.2, 96.1) | 88.0 (81.2, 93.0)  | 6.6 (-0.8, 13.2)                  | 1.3 (-1.5, 3.8)                    |
| Cross-reacting serotypes |                        |                         |                        |                         |                   |                    |                                   |                                    |
| 6A                       | 78.6 (71.0, 85.0)      | 92.7 (87.0, 96.4)       | 69.9 (63.6, 75.7)      | 91.6 (87.2, 94.9)       | 81.1 (71.5, 88.6) | 80.5 (72.7, 86.8)  | 8.7 (-0.5, 17.2)                  | 1.1 (-5.2, 6.6)                    |
| 19A                      | 81.4 (74.1, 87.4)      | 92.7 (87.0, 96.4)       | 78.8 (73.0, 83.8)      | 95.6 (92.0, 97.9)       | 83.3 (74.0, 90.4) | 80.5 (72.7, 86.8)  | 2.6 (-6.0, 10.5)                  | -2.9 (-8.8, 1.9)                   |



**Table S5: Antibody levels at 18 months of age**

**a) IgG GMCs (95% CIs) at 18 months of age following a 3+1, 2+1, 3+0 or two-dose schedule of PCV10**

|                          | GMC, µg/ml (95% CI) |                   |                   |                    | Ratio of GMCs (95% CI) |                   |                   |
|--------------------------|---------------------|-------------------|-------------------|--------------------|------------------------|-------------------|-------------------|
|                          | 3+1<br>(n=48)       | 2+1<br>(n=47)     | 3+0<br>(n=40)     | two-dose<br>(n=49) | 3+1 / 2+1              | 2+1 / 3+0         | 2+1 / two-dose    |
| Vaccine serotypes        |                     |                   |                   |                    |                        |                   |                   |
| 1                        | 0.77 (0.58, 1.02)   | 0.68 (0.53, 0.87) | 0.35 (0.24, 0.50) | 0.29 (0.24, 0.36)  | 1.14 (0.79, 1.65)      | 1.95 (1.28, 2.95) | 2.31 (1.70, 3.14) |
| 4                        | 0.70 (0.51, 0.96)   | 0.56 (0.45, 0.71) | 0.33 (0.24, 0.47) | 0.30 (0.24, 0.38)  | 1.23 (0.84, 1.81)      | 1.69 (1.14, 2.50) | 1.87 (1.36, 2.57) |
| 5                        | 0.69 (0.57, 0.85)   | 0.61 (0.49, 0.74) | 0.55 (0.44, 0.68) | 0.47 (0.39, 0.57)  | 1.15 (0.87, 1.52)      | 1.11 (0.82, 1.49) | 1.29 (0.97, 1.70) |
| 6B                       | 1.68 (1.21, 2.32)   | 1.15 (0.87, 1.54) | 1.05 (0.73, 1.51) | 0.78 (0.58, 1.05)  | 1.46 (0.95, 2.23)      | 1.10 (0.70, 1.72) | 1.48 (0.99, 2.22) |
| 7F                       | 0.68 (0.53, 0.87)   | 0.46 (0.35, 0.59) | 0.34 (0.25, 0.45) | 0.29 (0.23, 0.37)  | 1.48 (1.04, 2.11)      | 1.36 (0.93, 1.98) | 1.57 (1.11, 2.22) |
| 9V                       | 0.63 (0.49, 0.81)   | 0.55 (0.45, 0.67) | 0.43 (0.32, 0.58) | 0.32 (0.26, 0.39)  | 1.15 (0.84, 1.57)      | 1.29 (0.91, 1.82) | 1.74 (1.31, 2.32) |
| 14                       | 2.92 (2.06, 4.14)   | 1.94 (1.49, 2.52) | 1.63 (1.16, 2.27) | 1.10 (0.76, 1.60)  | 1.51 (0.98, 2.32)      | 1.19 (0.79, 1.80) | 1.76 (1.12, 2.76) |
| 18C                      | 0.85 (0.63, 1.13)   | 0.67 (0.53, 0.86) | 0.30 (0.22, 0.41) | 0.30 (0.24, 0.38)  | 1.26 (0.87, 1.83)      | 2.21 (1.51, 3.23) | 2.22 (1.61, 3.05) |
| 19F                      | 3.92 (3.05, 5.05)   | 3.36 (2.56, 4.40) | 1.85 (1.27, 2.68) | 1.92 (1.56, 2.35)  | 1.17 (0.81, 1.68)      | 1.82 (1.16, 2.84) | 1.75 (1.25, 2.44) |
| 23F                      | 0.96 (0.73, 1.24)   | 0.77 (0.59, 1.01) | 0.55 (0.39, 0.78) | 0.43 (0.33, 0.57)  | 1.24 (0.85, 1.81)      | 1.40 (0.91, 2.15) | 1.77 (1.21, 2.60) |
| Cross-reacting serotypes |                     |                   |                   |                    |                        |                   |                   |
| 6A                       | 0.72 (0.55, 0.95)   | 0.59 (0.46, 0.76) | 0.64 (0.46, 0.89) | 0.49 (0.37, 0.65)  | 1.23 (0.85, 1.78)      | 0.92 (0.62, 1.38) | 1.20 (0.83, 1.73) |
| 19A                      | 0.95 (0.76, 1.18)   | 0.86 (0.66, 1.13) | 0.74 (0.53, 1.04) | 0.64 (0.52, 0.80)  | 1.10 (0.78, 1.55)      | 1.16 (0.76, 1.78) | 1.34 (0.95, 1.88) |

**b) Percentage of participants with IgG ≥0.35µg/ml (95% CI) at 18 months of age following a 3+1, 2+1, 3+0 or two-dose schedule of PCV10**

|                          | Participants with IgG concentration ≥0.35µg/ml, % (95% CI) |                   |                   |                    | Risk difference, % (95% CI) |                   |                    |
|--------------------------|------------------------------------------------------------|-------------------|-------------------|--------------------|-----------------------------|-------------------|--------------------|
|                          | 3+1<br>(n=48)                                              | 2+1<br>(n=47)     | 3+0<br>(n=40)     | two-dose<br>(n=49) | 3+1 minus 2+1               | 2+1 minus 3+0     | 2+1 minus two-dose |
| Vaccine serotypes        |                                                            |                   |                   |                    |                             |                   |                    |
| 1                        | 75.0 (60.4, 86.4)                                          | 76.6 (62.0, 87.7) | 42.5 (27.0, 59.1) | 49.0 (34.4, 63.7)  | -1.6 (-18.5, 15.5)          | 34.1 (13.5, 51.2) | 27.6 (8.3, 44.2)   |
| 4                        | 68.8 (53.7, 81.3)                                          | 72.3 (57.4, 84.4) | 40.0 (24.9, 56.7) | 44.9 (30.7, 59.8)  | -3.6 (-21.3, 14.5)          | 32.3 (11.5, 49.7) | 27.4 (7.7, 44.3)   |
| 5                        | 89.6 (77.3, 96.5)                                          | 80.9 (66.7, 90.9) | 70.0 (53.5, 83.4) | 73.5 (58.9, 85.1)  | 8.7 (-5.9, 23.4)            | 10.9 (-7.1, 28.6) | 7.4 (-9.5, 23.7)   |
| 6B                       | 93.8 (82.8, 98.7)                                          | 95.7 (85.5, 99.5) | 90.0 (76.3, 97.2) | 85.7 (72.8, 94.1)  | -2.0 (-13.0, 8.8)           | 5.7 (-5.9, 19.2)  | 10.0 (-2.3, 22.8)  |
| 7F                       | 77.1 (62.7, 88.0)                                          | 59.6 (44.3, 73.6) | 45.0 (29.3, 61.5) | 34.7 (21.7, 49.6)  | 17.5 (-1.2, 34.7)           | 14.6 (-6.2, 33.8) | 24.9 (4.9, 42.3)   |
| 9V                       | 72.9 (58.2, 84.7)                                          | 83.0 (69.2, 92.4) | 52.5 (36.1, 68.5) | 42.9 (28.8, 57.8)  | -10.1 (-26.2, 6.8)          | 30.5 (10.9, 47.5) | 40.1 (21.0, 55.3)  |
| 14                       | 95.8 (85.7, 99.5)                                          | 97.9 (88.7, 99.9) | 97.5 (86.8, 99.9) | 89.8 (77.8, 96.6)  | -2.0 (-12.0, 7.4)           | 0.4 (-8.8, 10.9)  | 8.1 (-2.6, 19.8)   |
| 18C                      | 83.3 (69.8, 92.5)                                          | 74.5 (59.7, 86.1) | 35.0 (20.6, 51.7) | 44.9 (30.7, 59.8)  | 8.9 (-7.6, 25.0)            | 39.5 (18.6, 55.9) | 29.6 (9.9, 46.2)   |
| 19F                      | 100 (92.6, 100)                                            | 100 (92.5, 100)   | 97.5 (86.8, 99.9) | 98.0 (89.1, 99.9)  | 0.0 (-7.4, 7.6)             | 2.5 (-5.3, 12.9)  | 2.0 (-5.7, 10.7)   |
| 23F                      | 87.5 (74.8, 95.3)                                          | 80.9 (66.7, 90.9) | 60.0 (43.3, 75.1) | 59.2 (44.2, 73.0)  | 6.6 (-8.4, 21.6)            | 20.9 (1.7, 38.6)  | 21.7 (3.3, 38.1)   |
| Cross-reacting serotypes |                                                            |                   |                   |                    |                             |                   |                    |
| 6A                       | 75.0 (60.4, 86.4)                                          | 74.5 (59.7, 86.1) | 82.5 (67.2, 92.7) | 67.3 (52.5, 80.1)  | 0.5 (-16.7, 17.8)           | -8.0 (-24.5, 9.7) | 7.1 (-10.9, 24.5)  |
| 19A                      | 91.7 (80.0, 97.7)                                          | 83.0 (69.2, 92.4) | 77.5 (61.5, 89.2) | 77.6 (63.4, 88.2)  | 8.7 (-5.2, 22.7)            | 5.5 (-11.1, 22.5) | 5.4 (-10.7, 21.1)  |

**Figure S3: Comparison of serotype-specific IgG and OPA responses in the A) 3+0 and B) 2+1 PCV10 schedules.**  
 Bars represent the percentage of infants with IgG levels  $\geq 0.35\mu\text{g/mL}$  or  $\text{OI} \geq 8$ , post-primary series (5m) or post-booster (10m) for serotypes 18C, 6B, 1 and 23F.

### 3+0 Schedule

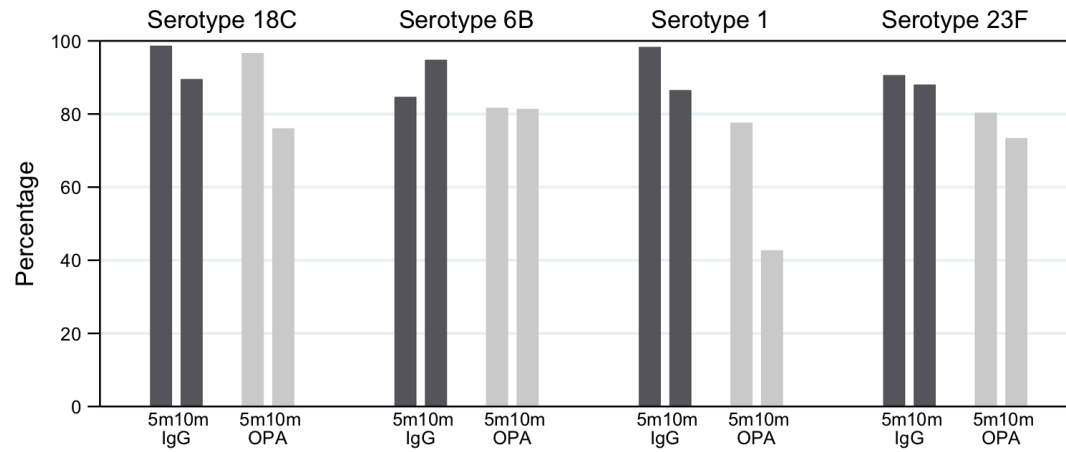

### 2+1 Schedule

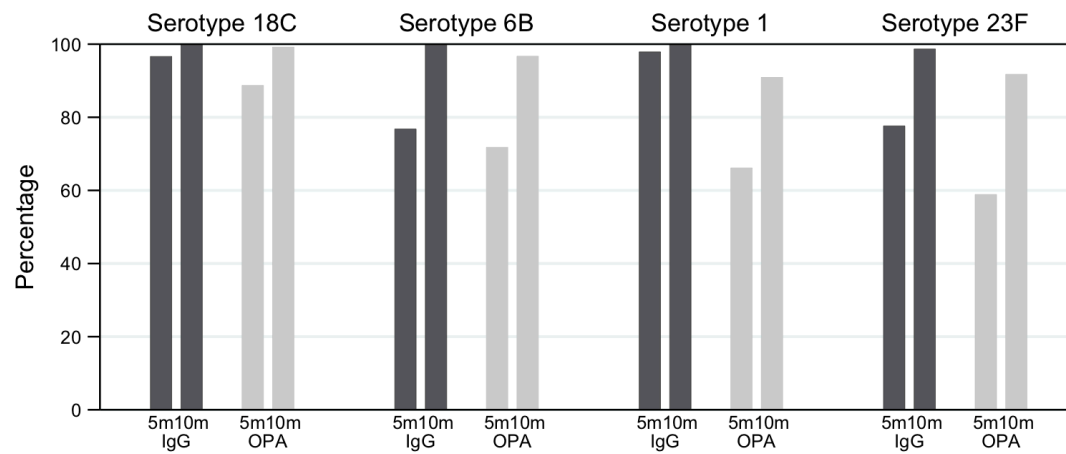

**Table S6: Comparative immunogenicity of a two-dose schedule (at 2 and 6 months of age) and a 2+1 schedule (at 2, 4, and 9 months of age) by ELISA and OPA**

|                          | GMC, µg/ml (95% CI)     |                       |                         | GMC ratio (95% CI)   |                      | Geometric mean opsonisation index (95% CI) |                      |                      | Ratio of geometric mean opsonisation indices (95% CI) |                      |
|--------------------------|-------------------------|-----------------------|-------------------------|----------------------|----------------------|--------------------------------------------|----------------------|----------------------|-------------------------------------------------------|----------------------|
|                          | 2,6m<br>(n=185)         | 2,4m<br>(n=237)       | 2,4&9m<br>(n=226)       | 2,6m / 2,4m          | 2,6m /<br>2,4&9m     | 2,6m<br>(n=97)                             | 2,4m<br>(n=124)      | 2,4&9m<br>(n=121)    | 2,6m / 2,4m                                           | 2,6m /<br>2,4&9m     |
| Vaccine serotypes        |                         |                       |                         |                      |                      |                                            |                      |                      |                                                       |                      |
| 1                        | 3.40<br>(3.01, 3.84)    | 2.21<br>(1.97, 2.48)  | 4.40<br>(3.91, 4.97)    | 1.54<br>(1.30, 1.82) | 0.77<br>(0.65, 0.92) | 85<br>(62, 118)                            | 22<br>(17, 28)       | 145<br>(106, 198)    | 3.86<br>(2.58, 5.79)                                  | 0.59<br>(0.38, 0.92) |
| 4                        | 4.28<br>(3.83, 4.79)    | 3.21<br>(2.87, 3.58)  | 4.75<br>(4.20, 5.37)    | 1.34<br>(1.14, 1.57) | 0.90<br>(0.76, 1.07) | 1056<br>(912, 1223)                        | 922<br>(820, 1036)   | 1280<br>(1072, 1529) | 1.15<br>(0.95, 1.38)                                  | 0.83<br>(0.65, 1.05) |
| 5                        | 1.31<br>(1.19, 1.43)    | 1.17<br>(1.07, 1.27)  | 1.31<br>(1.20, 1.43)    | 1.12<br>(0.99, 1.26) | 0.99<br>(0.88, 1.13) | 582<br>(453, 749)                          | 351<br>(286, 430)    | 768<br>(627, 941)    | 1.66<br>(1.21, 2.28)                                  | 0.76<br>(0.55, 1.04) |
| 6B                       | 2.59<br>(2.25, 2.99)    | 0.80<br>(0.69, 0.92)  | 6.17<br>(5.50, 6.92)    | 3.25<br>(2.66, 3.97) | 0.42<br>(0.35, 0.50) | 160<br>(111, 233)                          | 59<br>(40, 86)       | 299<br>(224, 399)    | 2.71<br>(1.58, 4.65)                                  | 0.54<br>(0.34, 0.85) |
| 7F                       | 2.20<br>(2.01, 2.40)    | 2.07<br>(1.89, 2.27)  | 2.65<br>(2.41, 2.91)    | 1.06<br>(0.93, 1.21) | 0.83<br>(0.73, 0.95) | 466<br>(348, 623)                          | 250<br>(182, 343)    | 484<br>(369, 636)    | 1.86<br>(1.20, 2.90)                                  | 0.96<br>(0.65, 1.43) |
| 9V                       | 2.40<br>(2.17, 2.66)    | 1.63<br>(1.47, 1.81)  | 3.34<br>(3.02, 3.69)    | 1.47<br>(1.27, 1.71) | 0.72<br>(0.62, 0.83) | 253<br>(186, 343)                          | 73<br>(52, 102)      | 308<br>(217, 436)    | 3.46<br>(2.18, 5.50)                                  | 0.82<br>(0.51, 1.32) |
| 14                       | 8.59<br>(7.43, 9.94)    | 5.86<br>(5.11, 6.73)  | 11.76<br>(10.45, 13.24) | 1.47<br>(1.20, 1.79) | 0.73<br>(0.61, 0.88) | 296<br>(210, 417)                          | 132<br>(92, 191)     | 394<br>(293, 531)    | 2.24<br>(1.34, 3.74)                                  | 0.75<br>(0.48, 1.18) |
| 18C                      | 2.95<br>(2.61, 3.34)    | 1.86<br>(1.64, 2.11)  | 5.16<br>(4.68, 5.70)    | 1.59<br>(1.33, 1.89) | 0.57<br>(0.49, 0.67) | 329<br>(239, 453)                          | 124<br>(88, 175)     | 732<br>(564, 950)    | 2.65<br>(1.65, 4.26)                                  | 0.45<br>(0.30, 0.67) |
| 19F                      | 16.47<br>(14.50, 18.72) | 9.54<br>(8.37, 10.87) | 16.16<br>(14.45, 18.08) | 1.73<br>(1.43, 2.08) | 1.02<br>(0.86, 1.21) | 1133<br>(936, 1371)                        | 1217<br>(1078, 1375) | 1579<br>(1380, 1807) | 0.93<br>(0.75, 1.16)                                  | 0.72<br>(0.57, 0.90) |
| 23F                      | 2.17<br>(1.90, 2.48)    | 0.89<br>(0.78, 1.02)  | 3.55<br>(3.15, 3.99)    | 2.43<br>(2.00, 2.95) | 0.61<br>(0.51, 0.73) | 74<br>(53, 104)                            | 29<br>(21, 41)       | 149<br>(109, 202)    | 2.55<br>(1.56, 4.17)                                  | 0.50<br>(0.32, 0.79) |
| Cross-reacting serotypes |                         |                       |                         |                      |                      |                                            |                      |                      |                                                       |                      |
| 6A                       | 0.64<br>(0.55, 0.73)    | 0.31<br>(0.28, 0.35)  | 1.44<br>(1.25, 1.66)    | 2.04<br>(1.71, 2.43) | 0.44<br>(0.36, 0.54) | 77<br>(46, 130)                            | 18<br>(12, 26)       | 118<br>(74, 189)     | 4.39<br>(2.31, 8.33)                                  | 0.65<br>(0.32, 1.31) |
| 19A                      | 0.93<br>(0.81, 1.06)    | 0.55<br>(0.49, 0.62)  | 1.76<br>(1.55, 2.00)    | 1.68<br>(1.41, 2.01) | 0.53<br>(0.44, 0.64) | 16<br>(11, 23)                             | 9<br>(7, 11)         | 25<br>(18, 34)       | 1.90<br>(1.29, 2.81)                                  | 0.66<br>(0.41, 1.05) |

Immunogenicity 4-weeks after a two-dose schedule (blood at 7 months of age), compared with immunogenicity 4-weeks post-primary series (blood at 5 months of age) and immunogenicity 4-weeks post-booster (blood at 10 months of age) in a 2+1 schedule.
